# Supplementary material for: Computational insights into strain-increase allylborations for alkylidenecyclopropanes
Source: Royal Society of Chemistry journal article supplement (doi:10.1039/d2cc02264h), 2022-01-01
Supplement: d2cc02264h1.pdf [file d2cc02264h1.pdf]

## Electronic Supplementary Information

### Computational insights into strain-increase allylboration for alkylidenecyclopropanes

Lingfei Hu<sup>a</sup>, Han Gao<sup>a</sup>, Yanlei Hu<sup>a</sup>, Xiangying Lv<sup>a</sup>, Yan-Bo Wu<sup>b</sup> and Gang Lu<sup>\*,a</sup>

<sup>a</sup> School of Chemistry and Chemical Engineering, Key Laboratory of Colloid and Interface Chemistry, Ministry of Education, Shandong University, Jinan, Shandong 250100, China

<sup>b</sup> Key Lab for Materials of Energy Conversion and Storage of Shanxi Province and Key Lab of Chemical Biology and Molecular Engineering of Ministry of Education, Institute of Molecular Science, Shanxi University, Taiyuan, Shanxi 030006, China

Corresponding Author: [ganglu@sdu.edu.cn](mailto:ganglu@sdu.edu.cn)

#### Table of Contents

|                                                                                 |     |
|---------------------------------------------------------------------------------|-----|
| <b>Computational Details</b> .....                                              | S2  |
| <b>Ring Strain Energy</b> .....                                                 | S3  |
| <b>Energy Profiles with Different Allylborationates</b> .....                   | S4  |
| <b>Orbital Interactions</b> .....                                               | S5  |
| <b>Allylboration with Ketone</b> .....                                          | S7  |
| <b>Energy Terms of EDA along IRC</b> .....                                      | S8  |
| <b>Cartesian Coordinates (Å) and Energies of the Optimized Structures</b> ..... | S11 |
| <b>References</b> .....                                                         | S30 |

## Computational Details

The M06-2X functional with dispersion corrections (D3)<sup>1</sup> and the def2-SVP basis set were used for geometry optimizations for all intermediates and transition states. All minima have zero imaginary frequency and all transition states have only one imaginary frequency and were confirmed by intrinsic reaction coordinate (IRC) calculations. Single-point energies were calculated by using M06-2X with dispersion corrections (D3) and the def2-TZVP basis set. Solvation energy corrections were calculated using the SMD model<sup>2</sup> with THF as solvent. All these calculations were carried out with Gaussian 09.<sup>3</sup>

Energy decomposition analysis (EDA) calculations at the M06-2X-D3/def2-TZVP level of theory were performed by using the second-generation EDA based on absolutely localized orbitals (ALMO-EDA2) implemented in Q-Chem 5.2.<sup>4</sup> The complementary occupied-virtual pairs (COVPs) were computed to figure out the direction of charge transfer and the most significant orbitals. Mostly, the targeted C–C bonds in different allylboration transition states have different bond distances. To minimize the effect of early or late transition states in comparing each energy term among these transition states, we performed EDA calculations along the reaction coordinates obtained from IRC calculations. The reported energies in the bar charts are the average of  $\Delta\Delta E$  values at the region of C–C bond distances that correspond to the allylboration transition states. The geometries and molecular orbitals were visualized using CYLview<sup>5</sup> and IQmol, respectively. The NBO donor-acceptor interactions were analyzed by using NBOPro.<sup>6</sup>

## Ring Strain Energy

We computed the ring strain energies of allylboronate **1b** and alkylidenecyclopropane **2b** based on the homodesmotic reactions shown in Fig. S1. The much larger ring strain of **2b** than **1b** indicates the allylboration of **1b** with benzaldehyde to generate **2b** suffers from a great strain increase.



ring strain energy of **1b**:  $\Delta H_{\text{strain}} = 19.5$  kcal/mol



ring strain energy of **2b**:  $\Delta H_{\text{strain}} = 36.9$  kcal/mol

**Fig. S1.** Computed ring strain energies of **1b** and **2b**.

## Energy Profiles with Different Allylboronates

The energy profiles of allylboration with allylboronates **1a**, **1b** and **1d** are shown in Fig. S2. The results show that **TS1**~**TS3** require barriers of 21.2, 27.3 and 15.9 kcal/mol with respect to the separated allylboronates and benzaldehyde, respectively. The barrier trend is consistent with the relative barriers of **TS1**~**TS3** with respect to the complexes of allylboronates with benzaldehyde (**IM1**~**IM2**), which are 12.3, 19.5 and 9.8 kcal/mol, respectively.

In addition, although the allylboration with **1b** and **1d** to form **IM2a** and **IM3a** intermediates are strain-increase processes, the reactions are thermodynamically favorable and exothermic by 13.8 and 16.8 kcal/mol, respectively. This indicates that the increased strain energy can be overcome by forming C-C and B-O bonds. In contrast, the unstrained allylboration with **1a** is much more thermodynamically favorable, which is exothermic by 28.7 kcal/mol.



**Fig. S2.** Energy profiles for allylboration with substrates **1a**, **1b** and **1d**.

## Orbital Interactions

Fig. S3 shows the cyclopropyl “quasi  $\pi$ ” orbital and the olefin  $\pi^*$  orbital. These two orbitals are nearly perpendicular to each other, which leads to ineffective orbital overlaps. Thus, it is less possible for the electron donation from cyclopropyl to olefin in **TS2**.



**Fig. S3.** The cyclopropyl “quasi  $\pi$ ” and olefin  $\pi^*$  orbitals.

To further understand the effects of cyclopropyl and dimethyl substituents on the reactivity of allylboration, we analyzed donor-acceptor interactions based on natural bond orbitals for **TS1** and **TS2**. As shown in Fig. S4, the donor-acceptor interaction from  $\sigma(\text{C-B})$  to  $\pi^*(\text{C=C})$  in **TS1** ( $\Delta E = 19.0$  kcal/mol) is much stronger than that in **TS2** ( $\Delta E = 11.6$  kcal/mol). This is mostly due to the more effective orbital overlap in **TS1** with a smaller  $\angle\text{BCC}$  ( $100.2^\circ$ ) than that in **TS2** with a larger  $\angle\text{BCC}$  ( $104.8^\circ$ ). In addition, the cyclopropyl  $\sigma^*(\text{C-C})$  in **TS2** ( $\Delta E = 4.1$  and  $1.2$  kcal/mol) is a better electron acceptor than the dimethyl  $\sigma^*(\text{C-C})$  in **TS1** ( $\Delta E = 0.7$  and  $1.9$  kcal/mol). Therefore, compared with **TS1** with dimethyl substituents, the weaker  $\sigma(\text{C-B}) \rightarrow \pi^*(\text{C=C})$  and stronger  $\pi(\text{C=C}) \rightarrow \sigma^*(\text{C-C})$  interactions in **TS2** with cyclopropyl group result in much weaker nucleophilicity of the double bond toward aldehyde.

We further computed the allylboration transition state (**TS4**, Fig. S4) with Me and  $\text{CF}_3$ . Indeed, due to the electron-withdrawing property of  $\text{CF}_3$ , the barrier of **TS4** is 2.2 kcal/mol higher than that of **TS1** with dimethyl group. Nevertheless, **TS4** is more favorable than **TS2** with cyclopropyl group. This can be ascribed to the donor-acceptor interactions based on the results of NBO analysis. As shown Fig. S4, the barrier trend of these transition states is consistent with the strength of  $\sigma(\text{C-B}) \rightarrow \pi^*(\text{C=C})$  orbital interactions.



**Fig. S4.** NBO donor-acceptor interactions in **TS1**, **TS2** and **TS4**.

## Allylboration with Ketone

The Aggarwal's experiment shows the allylboration cannot be applied for ketone even with more acidic vinylcyclopropyl boronates. The computed barrier for the allylboration with ketone (**TS5**,  $\Delta G^\ddagger = 24.5$  kcal/mol, Fig. S5) is much higher than that with aldehyde (**TS3**,  $\Delta G^\ddagger = 15.9$  kcal/mol), which is in line with the experimental result. The interaction of acetophenone with acidic boron center is weaker than that of benzaldehyde, which is evidenced by the higher energy of **IM5** and the longer B $\cdots$ O distance (1.73 Å) in **IM5** than that in **IM3** (1.68 Å). Thus, compared with **IM3** ( $\Delta E_{\text{Pauli}} = 124.0$  kcal/mol), **IM5** sustains smaller lp(lp repulsion in advance ( $\Delta E_{\text{Pauli}} = 109.2$  kcal/mol). The ensuing **TS5** suffers from the rest of lp(lp repulsion as well as  $\pi(\pi)$  repulsion ( $\Delta E_{\text{Pauli}} = 269.7$  kcal/mol), which is more repulsive than that in **TS3** ( $\Delta E_{\text{Pauli}} = 254.7$  kcal/mol). In addition, the larger deformation of acetophenone than benzaldehyde leads to greater distortion energy in **TS5** ( $\Delta E_{\text{dist}} = 66.5$  kcal/mol) than that in **TS3** ( $\Delta E_{\text{dist}} = 54.8$  kcal/mol). Taken together, the low reactivity with ketone can be ascribed to the relatively weak O(ketone) $\rightarrow$ B interaction and large geometric deformations.



**Fig. S5.** Comparison of allylboration with aldehyde and ketone.

## Energy Terms of EDA along IRC

**Table S1. EDA energy terms of TS1 along IRC**

| Energy terms<br>(in kcal/mol)<br><br>$r(\text{C-C})$<br>in <b>TS1</b> (in Å) | Steric effect:<br>$\Delta E_{\text{steric}}$ |                           | Electronic effects:<br>$\Delta E_{\text{elec}}$ |                        |                         | Dispersion effect:<br>$\Delta E_{\text{disp}}$ |
|------------------------------------------------------------------------------|----------------------------------------------|---------------------------|-------------------------------------------------|------------------------|-------------------------|------------------------------------------------|
|                                                                              | $\Delta E_{\text{dist}}$                     | $\Delta E_{\text{Pauli}}$ | $\Delta E_{\text{elstat}}$                      | $\Delta E_{\text{oi}}$ |                         |                                                |
|                                                                              |                                              |                           |                                                 | $\Delta E_{\text{ct}}$ | $\Delta E_{\text{pol}}$ |                                                |
| 2.47                                                                         | 28.86                                        | 181.37                    | -97.570                                         | -45.19                 | -43.45                  | -23.91                                         |
| 2.43                                                                         | 31.46                                        | 190.63                    | -102.21                                         | -48.68                 | -46.31                  | -24.39                                         |
| 2.38                                                                         | 34.45                                        | 200.56                    | -107.22                                         | -52.71                 | -49.38                  | -24.89                                         |
| 2.34                                                                         | 38.01                                        | 211.33                    | -112.68                                         | -57.43                 | -52.78                  | -25.39                                         |
| 2.28 (TS)                                                                    | 42.23                                        | 222.97                    | -118.59                                         | -62.93                 | -56.55                  | -25.92                                         |
| 2.23                                                                         | 46.84                                        | 235.57                    | -124.95                                         | -69.09                 | -60.67                  | -26.46                                         |
| 2.19                                                                         | 52.15                                        | 249.12                    | -131.81                                         | -76.08                 | -65.27                  | -27.02                                         |
| 2.14                                                                         | 58.24                                        | 263.64                    | -139.20                                         | -83.99                 | -70.40                  | -27.60                                         |
| 2.04                                                                         | 72.62                                        | 296.06                    | -155.75                                         | -102.43                | -82.75                  | -28.83                                         |

**Table S2. EDA energy terms of IM1**

| Energy terms<br>(in kcal/mol)<br><br>$r(\text{C-C})$<br>in <b>IM1</b> (in Å) | Steric effect:<br>$\Delta E_{\text{steric}}$ |                           | Electronic effects:<br>$\Delta E_{\text{elec}}$ |                        |                         | Dispersion effect:<br>$\Delta E_{\text{disp}}$ |
|------------------------------------------------------------------------------|----------------------------------------------|---------------------------|-------------------------------------------------|------------------------|-------------------------|------------------------------------------------|
|                                                                              | $\Delta E_{\text{dist}}$                     | $\Delta E_{\text{Pauli}}$ | $\Delta E_{\text{elstat}}$                      | $\Delta E_{\text{oi}}$ |                         |                                                |
|                                                                              |                                              |                           |                                                 | $\Delta E_{\text{ct}}$ | $\Delta E_{\text{pol}}$ |                                                |
| 3.13                                                                         | 1.0                                          | 19.8                      | -10.9                                           | -2.9                   | -2.1                    | -13.4                                          |

**Table S3. EDA energy terms of TS2 along IRC**

| Energy terms<br>(in kcal/mol)<br><br>$r(\text{C-C})$<br>in <b>TS2</b> (in Å) | Steric effect:<br>$\Delta E_{\text{steric}}$ |                           | Electronic effects:<br>$\Delta E_{\text{elec}}$ |                        |                         | Dispersion effect:<br>$\Delta E_{\text{disp}}$ |
|------------------------------------------------------------------------------|----------------------------------------------|---------------------------|-------------------------------------------------|------------------------|-------------------------|------------------------------------------------|
|                                                                              | $\Delta E_{\text{dist}}$                     | $\Delta E_{\text{Pauli}}$ | $\Delta E_{\text{elstat}}$                      | $\Delta E_{\text{oi}}$ |                         |                                                |
|                                                                              |                                              |                           |                                                 | $\Delta E_{\text{ct}}$ | $\Delta E_{\text{pol}}$ |                                                |
| 2.49                                                                         | 29.53                                        | 171.92                    | -92.17                                          | -42.48                 | -40.46                  | -22.33                                         |
| 2.44                                                                         | 31.70                                        | 180.73                    | -96.51                                          | -45.45                 | -42.92                  | -22.85                                         |
| 2.39                                                                         | 34.55                                        | 190.72                    | -101.46                                         | -49.19                 | -45.82                  | -23.39                                         |
| 2.33                                                                         | 37.79                                        | 201.47                    | -106.73                                         | -53.53                 | -48.97                  | -23.94                                         |
| 2.28                                                                         | 41.70                                        | 213.39                    | -112.62                                         | -58.72                 | -52.51                  | -24.51                                         |
| 2.22                                                                         | 46.22                                        | 226.39                    | -119.03                                         | -64.75                 | -56.46                  | -25.09                                         |
| 2.17                                                                         | 51.82                                        | 240.76                    | -126.17                                         | -71.95                 | -61.07                  | -25.69                                         |
| 2.12 (TS)                                                                    | 58.52                                        | 256.55                    | -134.05                                         | -80.40                 | -66.37                  | -26.31                                         |
| 2.06                                                                         | 65.86                                        | 273.99                    | -142.69                                         | -89.88                 | -72.43                  | -26.97                                         |
| 2.01                                                                         | 74.25                                        | 293.00                    | -152.13                                         | -100.52                | -79.52                  | -27.66                                         |
| 1.95                                                                         | 83.62                                        | 313.58                    | -162.37                                         | -112.12                | -87.86                  | -28.37                                         |
| 1.9                                                                          | 93.70                                        | 336.09                    | -173.55                                         | -124.21                | -97.87                  | -29.13                                         |
| 1.85                                                                         | 104.31                                       | 360.63                    | -185.70                                         | -136.14                | -110.04                 | -29.92                                         |

**Table S4. EDA energy terms of IM2**

| Energy terms<br>(in kcal/mol)<br><br>$r(\text{C-C})$<br>in <b>IM2</b> (in Å) | Steric effect:<br>$\Delta E_{\text{steric}}$ |                           | Electronic effects:<br>$\Delta E_{\text{elec}}$ |                        |                         | Dispersion effect:<br>$\Delta E_{\text{disp}}$ |
|------------------------------------------------------------------------------|----------------------------------------------|---------------------------|-------------------------------------------------|------------------------|-------------------------|------------------------------------------------|
|                                                                              | $\Delta E_{\text{dist}}$                     | $\Delta E_{\text{Pauli}}$ | $\Delta E_{\text{elstat}}$                      | $\Delta E_{\text{oi}}$ |                         |                                                |
|                                                                              |                                              |                           |                                                 | $\Delta E_{\text{ct}}$ | $\Delta E_{\text{pol}}$ |                                                |
| 3.24                                                                         | 0.4                                          | 17.1                      | -9.3                                            | -2.4                   | -1.8                    | -12.0                                          |

**Table S5. EDA energy terms of TS3 along IRC**

| Energy terms<br>(in kcal/mol)<br><br>$r(\text{C-C})$<br>in TS3 (in Å) | Steric effect:<br>$\Delta E_{\text{steric}}$ |                           | Electronic effects:<br>$\Delta E_{\text{elec}}$ |                        |                         | Dispersion effect:<br>$\Delta E_{\text{disp}}$ |
|-----------------------------------------------------------------------|----------------------------------------------|---------------------------|-------------------------------------------------|------------------------|-------------------------|------------------------------------------------|
|                                                                       | $\Delta E_{\text{dist}}$                     | $\Delta E_{\text{Pauli}}$ | $\Delta E_{\text{elstat}}$                      | $\Delta E_{\text{oi}}$ |                         |                                                |
|                                                                       |                                              |                           |                                                 | $\Delta E_{\text{ct}}$ | $\Delta E_{\text{pol}}$ |                                                |
| 2.36                                                                  | 32.88                                        | 196.5487                  | -104.46                                         | -52.60                 | -51.33                  | -27.13                                         |
| 2.3                                                                   | 35.58                                        | 205.7651                  | -108.92                                         | -56.70                 | -53.80                  | -27.65                                         |
| 2.26                                                                  | 39.17                                        | 216.085                   | -113.95                                         | -61.62                 | -56.66                  | -28.18                                         |
| 2.2                                                                   | 43.28                                        | 227.4197                  | -119.45                                         | -67.27                 | -59.85                  | -28.73                                         |
| 2.15                                                                  | 48.52                                        | 240.1296                  | -125.70                                         | -74.01                 | -63.65                  | -29.28                                         |
| 2.09 (TS)                                                             | 54.83                                        | 254.6461                  | -132.68                                         | -82.01                 | -68.17                  | -29.86                                         |
| 2.04                                                                  | 61.74                                        | 269.9624                  | -140.39                                         | -90.92                 | -73.32                  | -30.47                                         |
| 1.98                                                                  | 69.70                                        | 287.3841                  | -148.97                                         | -100.97                | -79.49                  | -31.11                                         |
| 1.93                                                                  | 78.63                                        | 306.5061                  | -158.43                                         | -111.94                | -86.89                  | -31.78                                         |
| 1.88                                                                  | 88.26                                        | 330.2808                  | -170.64                                         | -124.48                | -97.47                  | -31.96                                         |

**Table S6. EDA energy terms of IM3**

| Energy terms<br>(in kcal/mol)<br><br>$r(\text{C-C})$<br>in IM3 (in Å) | Steric effect:<br>$\Delta E_{\text{steric}}$ |                           | Electronic effects:<br>$\Delta E_{\text{elec}}$ |                        |                         | Dispersion effect:<br>$\Delta E_{\text{disp}}$ |
|-----------------------------------------------------------------------|----------------------------------------------|---------------------------|-------------------------------------------------|------------------------|-------------------------|------------------------------------------------|
|                                                                       | $\Delta E_{\text{dist}}$                     | $\Delta E_{\text{Pauli}}$ | $\Delta E_{\text{elstat}}$                      | $\Delta E_{\text{oi}}$ |                         |                                                |
|                                                                       |                                              |                           |                                                 | $\Delta E_{\text{ct}}$ | $\Delta E_{\text{pol}}$ |                                                |
| 3.07                                                                  | 18.2                                         | 124.0                     | -69.7                                           | -30.5                  | -32.7                   | -20.2                                          |

**Table S7. EDA energy terms of IM5**

| Energy terms<br>(in kcal/mol)<br><br>$r(\text{C-C})$<br>in IM3 (in Å) | Steric effect:<br>$\Delta E_{\text{steric}}$ |                           | Electronic effects:<br>$\Delta E_{\text{elec}}$ |                        |                         | Dispersion effect:<br>$\Delta E_{\text{disp}}$ |
|-----------------------------------------------------------------------|----------------------------------------------|---------------------------|-------------------------------------------------|------------------------|-------------------------|------------------------------------------------|
|                                                                       | $\Delta E_{\text{dist}}$                     | $\Delta E_{\text{Pauli}}$ | $\Delta E_{\text{elstat}}$                      | $\Delta E_{\text{oi}}$ |                         |                                                |
|                                                                       |                                              |                           |                                                 | $\Delta E_{\text{ct}}$ | $\Delta E_{\text{pol}}$ |                                                |
| 3.07                                                                  | 16.7                                         | 109.2                     | -60.6                                           | -24.5                  | -28.0                   | -21.9                                          |

**Table S8. EDA energy terms of TS5**

| Energy terms<br>(in kcal/mol)<br><br>$r(\text{C-C})$<br>in IM3 (in Å) | Steric effect:<br>$\Delta E_{\text{steric}}$ |                           | Electronic effects:<br>$\Delta E_{\text{elec}}$ |                        |                         | Dispersion effect:<br>$\Delta E_{\text{disp}}$ |
|-----------------------------------------------------------------------|----------------------------------------------|---------------------------|-------------------------------------------------|------------------------|-------------------------|------------------------------------------------|
|                                                                       | $\Delta E_{\text{dist}}$                     | $\Delta E_{\text{Pauli}}$ | $\Delta E_{\text{elstat}}$                      | $\Delta E_{\text{oi}}$ |                         |                                                |
|                                                                       |                                              |                           |                                                 | $\Delta E_{\text{ct}}$ | $\Delta E_{\text{pol}}$ |                                                |
| 3.07                                                                  | 66.5                                         | 269.7                     | -138.0                                          | -87.8                  | -73.0                   | -34.1                                          |

## Cartesian Coordinates (Å) and Energies of the Optimized Structures

PhCHO

M06-2X-D3 SCF energy: -345.16763038 a.u.  
M06-2X-D3 enthalpy: -345.049340 a.u.  
M06-2X-D3 free energy: -345.087019 a.u.  
M06-2X-D3 SCF energy in solution: -345.56590276 a.u.  
M06-2X-D3 enthalpy in solution: -345.447612 a.u.  
M06-2X-D3 free energy in solution: -345.485291 a.u.  
Three lowest frequencies (cm<sup>-1</sup>): 125.6342 224.1846 242.8568

Cartesian coordinates

| ATOM | X         | Y         | Z         |
|------|-----------|-----------|-----------|
| C    | 1.995670  | 0.468525  | -0.000154 |
| O    | 2.828519  | -0.398088 | 0.000306  |
| H    | 2.287309  | 1.547785  | -0.000439 |
| C    | -2.210717 | -0.253999 | 0.000079  |
| C    | -1.318993 | -1.330952 | -0.000031 |
| C    | 0.051217  | -1.096610 | -0.000189 |
| C    | 0.530441  | 0.218497  | -0.000145 |
| C    | -0.361669 | 1.293046  | -0.000048 |
| C    | -1.735174 | 1.057273  | 0.000097  |
| H    | -3.285898 | -0.440585 | 0.000268  |
| H    | -1.699677 | -2.353279 | 0.000002  |
| H    | 0.775769  | -1.912853 | -0.000184 |
| H    | 0.025082  | 2.315442  | -0.000094 |
| H    | -2.435381 | 1.893524  | 0.000343  |

1a

M06-2X-D3 SCF energy: -606.48643304 a.u.  
M06-2X-D3 enthalpy: -606.159634 a.u.  
M06-2X-D3 free energy: -606.218909 a.u.  
M06-2X-D3 SCF energy in solution: -607.18564577 a.u.  
M06-2X-D3 enthalpy in solution: -606.858847 a.u.  
M06-2X-D3 free energy in solution: -606.918122 a.u.  
Three lowest frequencies (cm<sup>-1</sup>): 21.2649 48.2182 101.5633

Cartesian coordinates

| ATOM | X         | Y         | Z         |
|------|-----------|-----------|-----------|
| B    | 0.479406  | 0.217066  | 0.173495  |
| C    | -1.677991 | 0.614368  | -0.396998 |
| C    | -1.552689 | -0.761275 | 0.345389  |
| C    | -1.528533 | -1.946759 | -0.616161 |
| H    | -1.230766 | -2.844912 | -0.058343 |
| H    | -2.514487 | -2.121851 | -1.068464 |
| H    | -0.793071 | -1.783868 | -1.417635 |
| C    | -2.573571 | -0.986893 | 1.446762  |
| H    | -2.488973 | -0.225345 | 2.231214  |
| H    | -3.594448 | -0.966475 | 1.037228  |
| H    | -2.404845 | -1.970710 | 1.905576  |
| C    | -2.184792 | 1.730480  | 0.512775  |
| H    | -3.251990 | 1.609821  | 0.745064  |
| H    | -1.619174 | 1.754375  | 1.455454  |
| H    | -2.041545 | 2.692300  | 0.001893  |

|   |           |           |           |
|---|-----------|-----------|-----------|
| C | -2.482844 | 0.571070  | -1.684616 |
| H | -3.514966 | 0.246641  | -1.485112 |
| H | -2.515936 | 1.575146  | -2.129321 |
| H | -2.029471 | -0.110745 | -2.414013 |
| O | -0.239058 | -0.670827 | 0.926763  |
| O | -0.305504 | 0.914005  | -0.706770 |
| C | 2.535918  | -0.275365 | -1.016491 |
| C | 3.219115  | -1.418106 | -1.108540 |
| H | 3.511995  | -1.818237 | -2.080893 |
| H | 3.512680  | -1.990301 | -0.225975 |
| H | 2.267746  | 0.252066  | -1.940405 |
| C | 2.049029  | 0.390687  | 0.252256  |
| C | 2.603257  | -0.271100 | 1.512767  |
| C | 2.413140  | 1.884353  | 0.204673  |
| H | 3.704633  | -0.239660 | 1.518798  |
| H | 2.283335  | -1.319755 | 1.590496  |
| H | 2.017591  | 2.413584  | 1.085109  |
| H | 1.994440  | 2.364594  | -0.691451 |
| H | 2.240004  | 0.248547  | 2.411480  |
| H | 3.506480  | 2.015273  | 0.190976  |

1b

|                                    |                    |         |          |
|------------------------------------|--------------------|---------|----------|
| M06-2X-D3 SCF energy:              | -605.26561778 a.u. |         |          |
| M06-2X-D3 enthalpy:                | -604.961537 a.u.   |         |          |
| M06-2X-D3 free energy:             | -605.018523 a.u.   |         |          |
| M06-2X-D3 SCF energy in solution:  | -605.96163447 a.u. |         |          |
| M06-2X-D3 enthalpy in solution:    | -605.657554 a.u.   |         |          |
| M06-2X-D3 free energy in solution: | -605.714540 a.u.   |         |          |
| Three lowest frequencies (cm-1):   | 25.1823            | 67.8254 | 103.9551 |

Cartesian coordinates

| ATOM | X         | Y         | Z         |
|------|-----------|-----------|-----------|
| B    | 0.561748  | -0.085600 | 0.020708  |
| C    | -1.520859 | 0.811196  | 0.112509  |
| C    | -1.607959 | -0.736688 | -0.116085 |
| C    | -1.853971 | -1.101227 | -1.578257 |
| H    | -1.690627 | -2.180352 | -1.703385 |
| H    | -2.880720 | -0.862443 | -1.888274 |
| H    | -1.153320 | -0.568334 | -2.237267 |
| C    | -2.595511 | -1.458221 | 0.784856  |
| H    | -2.331899 | -1.337188 | 1.842329  |
| H    | -3.615023 | -1.077145 | 0.624653  |
| H    | -2.587273 | -2.531642 | 0.550915  |
| C    | -1.764690 | 1.205180  | 1.566971  |
| H    | -2.822116 | 1.092863  | 1.843750  |
| H    | -1.154324 | 0.592071  | 2.245389  |
| H    | -1.474854 | 2.256203  | 1.700265  |
| C    | -2.388274 | 1.642407  | -0.816933 |
| H    | -3.449507 | 1.381412  | -0.690528 |
| H    | -2.264227 | 2.707747  | -0.578875 |
| H    | -2.106387 | 1.491892  | -1.865861 |
| O    | -0.273869 | -1.161361 | 0.206670  |
| O    | -0.135299 | 1.078484  | -0.170117 |
| C    | 3.039601  | 0.891912  | -0.099083 |

|   |          |           |           |
|---|----------|-----------|-----------|
| C | 2.718754 | 2.177957  | -0.250400 |
| H | 3.501611 | 2.933601  | -0.335386 |
| H | 1.679547 | 2.506100  | -0.293900 |
| H | 4.103073 | 0.618644  | -0.063795 |
| C | 2.108064 | -0.259472 | 0.030182  |
| C | 2.590378 | -1.576161 | -0.576719 |
| C | 2.596705 | -1.419418 | 0.895086  |
| H | 3.543870 | -1.540445 | -1.107555 |
| H | 1.833921 | -2.224642 | -1.021708 |
| H | 1.844184 | -1.958102 | 1.473125  |
| H | 3.555243 | -1.274019 | 1.397381  |

1d

|                                               |                     |         |         |
|-----------------------------------------------|---------------------|---------|---------|
| M06-2X-D3 SCF energy:                         | -1960.46808769 a.u. |         |         |
| M06-2X-D3 enthalpy:                           | -1960.016247 a.u.   |         |         |
| M06-2X-D3 free energy:                        | -1960.122426 a.u.   |         |         |
| M06-2X-D3 SCF energy in solution:             | -1962.75715005 a.u. |         |         |
| M06-2X-D3 enthalpy in solution:               | -1962.305309 a.u.   |         |         |
| M06-2X-D3 free energy in solution:            | -1962.411488 a.u.   |         |         |
| Three lowest frequencies (cm <sup>-1</sup> ): | 13.9014             | 19.0412 | 21.2414 |

Cartesian coordinates

| ATOM | X         | Y         | Z         |
|------|-----------|-----------|-----------|
| B    | 0.648890  | 1.666841  | -0.550970 |
| C    | -2.923447 | 0.928957  | -0.053823 |
| C    | -1.494278 | 0.320369  | -0.265622 |
| C    | -1.484112 | -0.636435 | -1.458377 |
| H    | -0.548311 | -1.209441 | -1.479396 |
| H    | -2.314481 | -1.349792 | -1.376337 |
| H    | -1.579982 | -0.083838 | -2.402495 |
| C    | -1.026279 | -0.397105 | 1.001224  |
| H    | -0.797265 | 0.320448  | 1.801073  |
| H    | -1.817218 | -1.075200 | 1.348529  |
| H    | -0.126395 | -0.992575 | 0.804399  |
| C    | -3.419289 | 1.656317  | -1.298785 |
| H    | -2.695462 | 2.436763  | -1.566862 |
| H    | -3.525082 | 0.964407  | -2.144647 |
| H    | -4.392310 | 2.121741  | -1.102695 |
| C    | -2.972320 | 1.833446  | 1.173712  |
| H    | -2.165613 | 2.574748  | 1.103183  |
| H    | -3.934896 | 2.354756  | 1.227707  |
| H    | -2.837191 | 1.253014  | 2.095865  |
| O    | -0.690538 | 1.465859  | -0.553842 |
| C    | 2.575421  | 3.439195  | -0.700856 |
| C    | 3.080648  | 4.438784  | 0.022812  |
| H    | 4.158082  | 4.598594  | 0.089199  |
| H    | 2.437263  | 5.126121  | 0.577969  |
| H    | 3.266713  | 2.764813  | -1.220277 |
| C    | 1.126291  | 3.124820  | -0.869517 |
| C    | 0.105161  | 4.231356  | -0.735991 |
| C    | 0.423572  | 3.721496  | -2.094364 |
| H    | 0.475926  | 5.222450  | -0.471756 |
| H    | -0.860762 | 3.964763  | -0.303693 |
| H    | -0.315073 | 3.100451  | -2.605916 |

|   |           |           |           |
|---|-----------|-----------|-----------|
| H | 1.041513  | 4.347448  | -2.741042 |
| O | -3.738742 | -0.252960 | 0.176856  |
| C | -5.030006 | -0.177542 | 0.427771  |
| C | -5.564836 | -1.611177 | 0.622588  |
| O | -5.720414 | 0.791848  | 0.504489  |
| F | -4.937048 | -2.199182 | 1.637122  |
| F | -5.347745 | -2.332519 | -0.473565 |
| F | -6.858378 | -1.593760 | 0.873280  |
| C | 1.712648  | 0.523028  | -0.281892 |
| C | 2.454435  | 0.506987  | 0.908480  |
| C | 1.965454  | -0.479483 | -1.222551 |
| C | 3.366992  | -0.512651 | 1.167655  |
| H | 2.322783  | 1.300299  | 1.648881  |
| C | 2.888003  | -1.494300 | -0.962534 |
| H | 1.438358  | -0.483804 | -2.179938 |
| C | 3.589579  | -1.527087 | 0.236778  |
| H | 4.307267  | -2.321860 | 0.439958  |
| C | 4.085874  | -0.539037 | 2.491911  |
| C | 3.091557  | -2.554705 | -2.011947 |
| F | 4.389337  | 0.690976  | 2.906493  |
| F | 5.217715  | -1.239585 | 2.424640  |
| F | 3.330402  | -1.096790 | 3.441294  |
| F | 3.928473  | -3.507195 | -1.607445 |
| F | 1.931141  | -3.139443 | -2.327498 |
| F | 3.580418  | -2.035599 | -3.139533 |

IM1

|                                    |                    |         |         |
|------------------------------------|--------------------|---------|---------|
| M06-2X-D3 SCF energy:              | -951.67105239 a.u. |         |         |
| M06-2X-D3 enthalpy:                | -951.223909 a.u.   |         |         |
| M06-2X-D3 free energy:             | -951.302370 a.u.   |         |         |
| M06-2X-D3 SCF energy in solution:  | -952.75897322 a.u. |         |         |
| M06-2X-D3 enthalpy in solution:    | -952.311830 a.u.   |         |         |
| M06-2X-D3 free energy in solution: | -952.390291 a.u.   |         |         |
| Three lowest frequencies (cm-1):   | 24.9212            | 27.8305 | 33.8716 |

Cartesian coordinates

| ATOM | X         | Y         | Z         |
|------|-----------|-----------|-----------|
| B    | -1.503676 | 0.739906  | 0.039802  |
| C    | -2.574219 | -1.073674 | -0.817454 |
| C    | -2.974728 | -0.867261 | 0.691710  |
| C    | -2.277220 | -1.837651 | 1.640703  |
| H    | -2.480948 | -1.518376 | 2.672098  |
| H    | -2.650269 | -2.863358 | 1.511148  |
| H    | -1.190846 | -1.816019 | 1.489395  |
| C    | -4.473907 | -0.873905 | 0.949677  |
| H    | -4.983090 | -0.078143 | 0.392970  |
| H    | -4.911180 | -1.843257 | 0.667639  |
| H    | -4.656397 | -0.711978 | 2.020749  |
| C    | -3.652170 | -0.600947 | -1.789681 |
| H    | -4.534667 | -1.255141 | -1.770156 |
| H    | -3.967674 | 0.425058  | -1.550934 |
| H    | -3.233930 | -0.601981 | -2.805626 |
| C    | -2.129188 | -2.485133 | -1.162649 |
| H    | -2.940734 | -3.204776 | -0.979504 |

|   |           |           |           |
|---|-----------|-----------|-----------|
| H | -1.857753 | -2.533943 | -2.226523 |
| H | -1.255542 | -2.778602 | -0.567469 |
| O | -2.462869 | 0.446342  | 0.969164  |
| O | -1.458405 | -0.181256 | -0.977849 |
| C | 0.382478  | 2.097517  | -0.986896 |
| C | 1.678942  | 2.333125  | -0.771097 |
| H | 2.401650  | 2.304176  | -1.589398 |
| H | 2.069833  | 2.552813  | 0.225464  |
| H | 0.055526  | 1.872882  | -2.010120 |
| C | 1.385337  | -0.682905 | 0.024956  |
| O | 0.723206  | -0.569187 | 1.029711  |
| H | 0.890539  | -0.786719 | -0.966338 |
| C | 5.650326  | -0.710055 | -0.002039 |
| C | 4.964633  | -0.594499 | 1.210713  |
| C | 3.574154  | -0.589104 | 1.223376  |
| C | 2.869195  | -0.699870 | 0.019930  |
| C | 3.555665  | -0.816345 | -1.191082 |
| C | 4.948848  | -0.821112 | -1.202981 |
| H | 6.741583  | -0.712808 | -0.009650 |
| H | 5.521359  | -0.507974 | 2.144852  |
| H | 3.007524  | -0.499547 | 2.151951  |
| H | 2.990270  | -0.895287 | -2.123127 |
| H | 5.489503  | -0.909617 | -2.146144 |
| C | -0.722346 | 2.118303  | 0.035952  |
| C | -0.239359 | 2.479583  | 1.441332  |
| C | -1.782177 | 3.148651  | -0.426761 |
| H | 0.212084  | 3.485179  | 1.451455  |
| H | 0.504572  | 1.757570  | 1.807089  |
| H | -2.635903 | 3.161269  | 0.266613  |
| H | -2.161020 | 2.913643  | -1.434276 |
| H | -1.084890 | 2.472146  | 2.143533  |
| H | -1.342249 | 4.157762  | -0.459167 |

TS1

M06-2X-D3 SCF energy: -951.65970704 a.u.  
M06-2X-D3 enthalpy: -951.213808 a.u.  
M06-2X-D3 free energy: -951.284810 a.u.  
M06-2X-D3 SCF energy in solution: -952.74450227 a.u.  
M06-2X-D3 enthalpy in solution: -952.298603 a.u.  
M06-2X-D3 free energy in solution: -952.369605 a.u.  
Three lowest frequencies (cm-1): -284.8726 41.2375 49.4155  
Imaginary frequency: -284.8726 cm-1

Cartesian coordinates

| ATOM | X         | Y         | Z         |
|------|-----------|-----------|-----------|
| B    | -0.970965 | 0.436144  | 0.172381  |
| C    | -2.586739 | -0.910382 | -0.808269 |
| C    | -2.527218 | -1.124590 | 0.750177  |
| C    | -1.683106 | -2.341423 | 1.140432  |
| H    | -1.510984 | -2.308147 | 2.225225  |
| H    | -2.188716 | -3.285247 | 0.891155  |
| H    | -0.703964 | -2.323828 | 0.642832  |
| C    | -3.887650 | -1.211412 | 1.426419  |
| H    | -4.454855 | -0.282273 | 1.292679  |

|   |           |           |           |
|---|-----------|-----------|-----------|
| H | -4.474948 | -2.050716 | 1.024277  |
| H | -3.747581 | -1.372206 | 2.504584  |
| C | -3.822746 | -0.121274 | -1.239170 |
| H | -4.737222 | -0.727597 | -1.168367 |
| H | -3.948452 | 0.777559  | -0.622031 |
| H | -3.689790 | 0.193040  | -2.284442 |
| C | -2.497488 | -2.195389 | -1.621647 |
| H | -3.327234 | -2.875576 | -1.376608 |
| H | -2.555921 | -1.953773 | -2.692603 |
| H | -1.548447 | -2.715012 | -1.440224 |
| O | -1.862779 | 0.050702  | 1.200165  |
| O | -1.432533 | -0.113145 | -1.067225 |
| C | 0.189506  | 2.258074  | -0.978222 |
| C | 1.549333  | 2.130426  | -0.940964 |
| H | 2.132011  | 2.128439  | -1.864491 |
| H | 2.105899  | 2.272096  | -0.013345 |
| H | -0.295575 | 2.229591  | -1.961659 |
| C | 1.290759  | -0.093835 | -0.494981 |
| O | 0.458961  | -0.076921 | 0.458299  |
| H | 0.911925  | -0.280265 | -1.509539 |
| C | 5.381450  | -0.969747 | 0.313111  |
| C | 4.504781  | -0.710367 | 1.369160  |
| C | 3.169014  | -0.418624 | 1.112532  |
| C | 2.707695  | -0.383194 | -0.209227 |
| C | 3.585915  | -0.649430 | -1.265592 |
| C | 4.921371  | -0.941604 | -1.004182 |
| H | 6.428180  | -1.198616 | 0.518678  |
| H | 4.866496  | -0.740248 | 2.397765  |
| H | 2.464426  | -0.223890 | 1.922807  |
| H | 3.216023  | -0.625023 | -2.293448 |
| H | 5.605469  | -1.149934 | -1.827658 |
| C | -0.701216 | 2.149560  | 0.158086  |
| C | -0.136105 | 2.551195  | 1.517911  |
| C | -2.076985 | 2.768817  | -0.084460 |
| H | 0.004039  | 3.643217  | 1.579089  |
| H | 0.825460  | 2.066266  | 1.732053  |
| H | -2.782452 | 2.419495  | 0.682674  |
| H | -2.468739 | 2.482631  | -1.070961 |
| H | -0.836097 | 2.245116  | 2.308076  |
| H | -2.026735 | 3.868271  | -0.035022 |

#### IM1a

|                                               |                    |         |         |
|-----------------------------------------------|--------------------|---------|---------|
| M06-2X-D3 SCF energy:                         | -951.73709194 a.u. |         |         |
| M06-2X-D3 enthalpy:                           | -951.287118 a.u.   |         |         |
| M06-2X-D3 free energy:                        | -951.361731 a.u.   |         |         |
| M06-2X-D3 SCF energy in solution:             | -952.82443868 a.u. |         |         |
| M06-2X-D3 enthalpy in solution:               | -952.374465 a.u.   |         |         |
| M06-2X-D3 free energy in solution:            | -952.449078 a.u.   |         |         |
| Three lowest frequencies (cm <sup>-1</sup> ): | 28.2831            | 32.1827 | 37.4641 |

#### Cartesian coordinates

| ATOM | X         | Y         | Z         |
|------|-----------|-----------|-----------|
| B    | -0.671436 | -0.449488 | 0.302861  |
| C    | -2.492259 | -1.141815 | -0.847562 |

|   |           |           |           |
|---|-----------|-----------|-----------|
| C | -2.770457 | -1.175209 | 0.700159  |
| C | -2.644497 | -2.578949 | 1.287388  |
| H | -2.640093 | -2.500987 | 2.382958  |
| H | -3.479864 | -3.223790 | 0.981403  |
| H | -1.701698 | -3.049839 | 0.973699  |
| C | -4.085443 | -0.540349 | 1.118929  |
| H | -4.121019 | 0.519849  | 0.839373  |
| H | -4.933982 | -1.060930 | 0.650868  |
| H | -4.194983 | -0.611107 | 2.209817  |
| C | -3.091318 | 0.085915  | -1.525598 |
| H | -4.187341 | 0.028885  | -1.579303 |
| H | -2.805174 | 0.997568  | -0.984794 |
| H | -2.689793 | 0.153913  | -2.546253 |
| C | -2.889781 | -2.406868 | -1.589012 |
| H | -3.968738 | -2.593727 | -1.483432 |
| H | -2.662629 | -2.290261 | -2.657601 |
| H | -2.338347 | -3.278041 | -1.215836 |
| O | -1.684683 | -0.397064 | 1.226366  |
| O | -1.065549 | -0.995518 | -0.895517 |
| C | 0.094566  | 2.369515  | -0.889657 |
| C | 1.468352  | 1.797595  | -0.675632 |
| H | 2.118350  | 2.036018  | -1.530792 |
| H | 1.943957  | 2.231524  | 0.216395  |
| H | -0.253500 | 2.431280  | -1.927138 |
| C | 1.463474  | 0.266411  | -0.492251 |
| O | 0.591595  | -0.045909 | 0.575571  |
| H | 1.094010  | -0.205934 | -1.417428 |
| C | 5.476654  | -1.088751 | 0.318037  |
| C | 4.571792  | -0.924981 | 1.365758  |
| C | 3.266451  | -0.505287 | 1.110085  |
| C | 2.854531  | -0.247853 | -0.199473 |
| C | 3.764571  | -0.418334 | -1.247174 |
| C | 5.069215  | -0.834728 | -0.991784 |
| H | 6.496712  | -1.418904 | 0.520134  |
| H | 4.883240  | -1.127879 | 2.391822  |
| H | 2.549106  | -0.384693 | 1.922581  |
| H | 3.444305  | -0.229642 | -2.275343 |
| H | 5.768773  | -0.968367 | -1.818491 |
| C | -0.739937 | 2.795540  | 0.073365  |
| C | -0.441427 | 2.738185  | 1.546452  |
| C | -2.080522 | 3.391496  | -0.264319 |
| H | -0.637576 | 3.714604  | 2.016730  |
| H | 0.587053  | 2.432749  | 1.766286  |
| H | -2.885946 | 2.874665  | 0.282928  |
| H | -2.295796 | 3.342343  | -1.340109 |
| H | -1.108702 | 1.999716  | 2.019894  |
| H | -2.117840 | 4.447163  | 0.049695  |

IM2

|                                   |                    |
|-----------------------------------|--------------------|
| M06-2X-D3 SCF energy:             | -950.44918026 a.u. |
| M06-2X-D3 enthalpy:               | -950.024638 a.u.   |
| M06-2X-D3 free energy:            | -950.102077 a.u.   |
| M06-2X-D3 SCF energy in solution: | -951.53440682 a.u. |
| M06-2X-D3 enthalpy in solution:   | -951.109865 a.u.   |

M06-2X-D3 free energy in solution: -951.187304 a.u.  
Three lowest frequencies (cm-1): 19.9919 29.6868 32.2341

Cartesian coordinates

| ATOM | X         | Y         | Z         |
|------|-----------|-----------|-----------|
| B    | 1.508587  | 0.777626  | 0.126083  |
| C    | 2.675105  | -1.063260 | 0.767768  |
| C    | 3.115143  | -0.610991 | -0.674630 |
| C    | 2.498940  | -1.460097 | -1.783097 |
| H    | 2.717210  | -0.981221 | -2.747700 |
| H    | 2.919766  | -2.475346 | -1.793302 |
| H    | 1.408334  | -1.512050 | -1.668768 |
| C    | 4.619349  | -0.503698 | -0.868497 |
| H    | 5.064465  | 0.222728  | -0.178102 |
| H    | 5.099453  | -1.481811 | -0.716266 |
| H    | 4.828959  | -0.172992 | -1.894900 |
| C    | 3.680052  | -0.670415 | 1.847424  |
| H    | 4.603195  | -1.262242 | 1.777868  |
| H    | 3.936940  | 0.395721  | 1.771397  |
| H    | 3.223512  | -0.842841 | 2.831690  |
| C    | 2.319050  | -2.536198 | 0.882793  |
| H    | 3.183423  | -3.166844 | 0.627366  |
| H    | 2.020609  | -2.761405 | 1.916245  |
| H    | 1.484585  | -2.790713 | 0.217651  |
| O    | 2.537485  | 0.701630  | -0.774435 |
| O    | 1.491205  | -0.280792 | 0.998415  |
| C    | -0.454152 | 1.989759  | 1.314882  |
| C    | -1.771395 | 2.180823  | 1.209319  |
| H    | -2.416787 | 2.174015  | 2.090103  |
| H    | -2.254444 | 2.338206  | 0.241267  |
| H    | -0.028905 | 1.804443  | 2.308287  |
| C    | -1.336466 | -0.748114 | -0.111531 |
| O    | -0.673384 | -0.578018 | -1.106352 |
| H    | -0.845776 | -0.910752 | 0.874237  |
| C    | -5.603058 | -0.752592 | -0.098844 |
| C    | -4.912206 | -0.560526 | -1.298815 |
| C    | -3.521501 | -0.562398 | -1.306176 |
| C    | -2.821699 | -0.756944 | -0.110605 |
| C    | -3.513239 | -0.948321 | 1.087807  |
| C    | -4.906481 | -0.946620 | 1.094460  |
| H    | -6.694349 | -0.749838 | -0.095083 |
| H    | -5.464995 | -0.409143 | -2.227061 |
| H    | -2.949426 | -0.413557 | -2.223702 |
| H    | -2.951242 | -1.088936 | 2.014578  |
| H    | -5.451191 | -1.093864 | 2.027923  |
| C    | 0.529068  | 1.986201  | 0.196204  |
| C    | 0.176630  | 2.619178  | -1.128203 |
| C    | 1.137458  | 3.318475  | -0.231521 |
| H    | -0.821683 | 3.047262  | -1.231944 |
| H    | 0.563987  | 2.129879  | -2.023221 |
| H    | 2.194764  | 3.322566  | -0.502915 |
| H    | 0.780617  | 4.202476  | 0.300493  |

TS2

M06-2X-D3 SCF energy: -950.42765182 a.u.  
M06-2X-D3 enthalpy: -950.004680 a.u.  
M06-2X-D3 free energy: -950.074164 a.u.  
M06-2X-D3 SCF energy in solution: -951.50963623 a.u.  
M06-2X-D3 enthalpy in solution: -951.086664 a.u.  
M06-2X-D3 free energy in solution: -951.156148 a.u.  
Three lowest frequencies (cm-1): -374.9500 36.1097 46.4773  
Imaginary frequency: -374.9500 cm-1

Cartesian coordinates

| ATOM | X         | Y         | Z         |
|------|-----------|-----------|-----------|
| B    | 0.916986  | 0.346082  | -0.129414 |
| C    | 2.621596  | -0.905363 | 0.799388  |
| C    | 2.609171  | -1.046762 | -0.764958 |
| C    | 1.881438  | -2.312700 | -1.222116 |
| H    | 1.716517  | -2.245365 | -2.306343 |
| H    | 2.461790  | -3.221438 | -1.007502 |
| H    | 0.899909  | -2.393724 | -0.733392 |
| C    | 3.980518  | -0.965049 | -1.416760 |
| H    | 4.450039  | 0.007741  | -1.223485 |
| H    | 4.641905  | -1.761542 | -1.043376 |
| H    | 3.876291  | -1.083089 | -2.504501 |
| C    | 3.709149  | 0.051248  | 1.289167  |
| H    | 4.715553  | -0.377718 | 1.180043  |
| H    | 3.664800  | 1.000827  | 0.738602  |
| H    | 3.531216  | 0.264640  | 2.352708  |
| C    | 2.722831  | -2.227314 | 1.547511  |
| H    | 3.648547  | -2.759719 | 1.281210  |
| H    | 2.735725  | -2.035358 | 2.629894  |
| H    | 1.864471  | -2.873300 | 1.325777  |
| O    | 1.834952  | 0.078039  | -1.170426 |
| O    | 1.355849  | -0.311831 | 1.065740  |
| C    | -0.181528 | 2.137040  | 1.168728  |
| C    | -1.542176 | 1.952477  | 1.048423  |
| H    | -2.180809 | 1.918898  | 1.933630  |
| H    | -2.027378 | 2.198665  | 0.101257  |
| H    | 0.277323  | 2.053537  | 2.161325  |
| C    | -1.349608 | -0.082392 | 0.502717  |
| O    | -0.502209 | -0.063406 | -0.457575 |
| H    | -0.990152 | -0.415259 | 1.486369  |
| C    | -5.433603 | -0.900097 | -0.436834 |
| C    | -4.540476 | -0.556186 | -1.453757 |
| C    | -3.209061 | -0.284383 | -1.153550 |
| C    | -2.767232 | -0.355602 | 0.172369  |
| C    | -3.661519 | -0.705634 | 1.189169  |
| C    | -4.992905 | -0.976633 | 0.884799  |
| H    | -6.476413 | -1.113369 | -0.676230 |
| H    | -4.885206 | -0.504072 | -2.487412 |
| H    | -2.492527 | -0.023796 | -1.933968 |
| H    | -3.307999 | -0.767721 | 2.221356  |
| H    | -5.688206 | -1.251990 | 1.678801  |
| C    | 0.683527  | 2.057367  | 0.041645  |
| C    | 0.624829  | 2.839150  | -1.223159 |
| C    | 1.846037  | 2.912073  | -0.329671 |
| H    | -0.030473 | 3.713290  | -1.264541 |
| H    | 0.739029  | 2.289112  | -2.159747 |

|   |          |          |           |
|---|----------|----------|-----------|
| H | 2.741876 | 2.407184 | -0.696091 |
| H | 2.014565 | 3.833302 | 0.232113  |

IM2a

|                                    |                    |         |         |
|------------------------------------|--------------------|---------|---------|
| M06-2X-D3 SCF energy:              | -950.49054656 a.u. |         |         |
| M06-2X-D3 enthalpy:                | -950.064417 a.u.   |         |         |
| M06-2X-D3 free energy:             | -950.137210 a.u.   |         |         |
| M06-2X-D3 SCF energy in solution:  | -951.57505161 a.u. |         |         |
| M06-2X-D3 enthalpy in solution:    | -951.148922 a.u.   |         |         |
| M06-2X-D3 free energy in solution: | -951.221715 a.u.   |         |         |
| Three lowest frequencies (cm-1):   | 28.1764            | 36.0659 | 43.6308 |

Cartesian coordinates

| ATOM | X         | Y         | Z         |
|------|-----------|-----------|-----------|
| B    | -0.681470 | -0.378548 | 0.291450  |
| C    | -2.515385 | -1.133124 | -0.801491 |
| C    | -2.805840 | -0.987745 | 0.737024  |
| C    | -2.710600 | -2.319440 | 1.478336  |
| H    | -2.712413 | -2.119718 | 2.558372  |
| H    | -3.555435 | -2.979664 | 1.238646  |
| H    | -1.774547 | -2.839151 | 1.227669  |
| C    | -4.113290 | -0.290912 | 1.070081  |
| H    | -4.145007 | 0.723355  | 0.653889  |
| H    | -4.965973 | -0.861375 | 0.673088  |
| H    | -4.222628 | -0.218686 | 2.160866  |
| C    | -3.077707 | 0.023729  | -1.622589 |
| H    | -4.174452 | -0.015088 | -1.680033 |
| H    | -2.772940 | 0.988920  | -1.194918 |
| H    | -2.669973 | -0.040634 | -2.641054 |
| C    | -2.941731 | -2.463072 | -1.400395 |
| H    | -4.026012 | -2.609117 | -1.285311 |
| H    | -2.704160 | -2.473289 | -2.473009 |
| H    | -2.416299 | -3.300727 | -0.926557 |
| O    | -1.706299 | -0.177255 | 1.183128  |
| O    | -1.084554 | -1.033829 | -0.848147 |
| C    | 0.051371  | 2.154512  | -1.197587 |
| C    | 1.449272  | 1.671115  | -0.925030 |
| H    | 2.106617  | 1.825726  | -1.793562 |
| H    | 1.873808  | 2.227881  | -0.075871 |
| H    | -0.364350 | 2.026734  | -2.202641 |
| C    | 1.479576  | 0.174788  | -0.545109 |
| O    | 0.599408  | -0.018029 | 0.543537  |
| H    | 1.137241  | -0.424530 | -1.405116 |
| C    | 5.511301  | -0.954713 | 0.485089  |
| C    | 4.585402  | -0.682757 | 1.491132  |
| C    | 3.274409  | -0.334189 | 1.166797  |
| C    | 2.878214  | -0.257808 | -0.170258 |
| C    | 3.809183  | -0.536118 | -1.175530 |
| C    | 5.119519  | -0.881070 | -0.851767 |
| H    | 6.535861  | -1.228615 | 0.741302  |
| H    | 4.884945  | -0.744151 | 2.538751  |
| H    | 2.541011  | -0.128077 | 1.946929  |
| H    | 3.501487  | -0.489077 | -2.223617 |
| H    | 5.835760  | -1.100098 | -1.645301 |

|   |           |          |           |
|---|-----------|----------|-----------|
| C | -0.704701 | 2.663067 | -0.232692 |
| C | -0.783399 | 3.031943 | 1.181321  |
| C | -1.973225 | 3.218900 | 0.240755  |
| H | -0.255290 | 3.927042 | 1.521605  |
| H | -0.849178 | 2.216292 | 1.907097  |
| H | -2.821299 | 2.542255 | 0.379007  |
| H | -2.242066 | 4.236799 | -0.054136 |

IM3

|                                    |                     |         |         |
|------------------------------------|---------------------|---------|---------|
| M06-2X-D3 SCF energy:              | -2305.65848300 a.u. |         |         |
| M06-2X-D3 enthalpy:                | -2305.086322 a.u.   |         |         |
| M06-2X-D3 free energy:             | -2305.208542 a.u.   |         |         |
| M06-2X-D3 SCF energy in solution:  | -2308.33693884 a.u. |         |         |
| M06-2X-D3 enthalpy in solution:    | -2307.764778 a.u.   |         |         |
| M06-2X-D3 free energy in solution: | -2307.886998 a.u.   |         |         |
| Three lowest frequencies (cm-1):   | 13.2450             | 15.0795 | 16.7056 |

Cartesian coordinates

| ATOM | X         | Y         | Z         |
|------|-----------|-----------|-----------|
| B    | 0.570674  | 0.446633  | -1.097648 |
| C    | -3.145800 | 0.478931  | -0.834800 |
| C    | -1.789874 | -0.050620 | -0.251704 |
| C    | -1.797735 | -1.581705 | -0.178037 |
| H    | -0.928441 | -1.940435 | 0.388745  |
| H    | -2.707313 | -1.939451 | 0.322885  |
| H    | -1.745720 | -2.015715 | -1.185993 |
| C    | -1.559009 | 0.538257  | 1.144001  |
| H    | -1.335347 | 1.611440  | 1.085256  |
| H    | -2.448838 | 0.389060  | 1.770625  |
| H    | -0.717382 | 0.032758  | 1.633900  |
| C    | -3.419960 | -0.083813 | -2.223978 |
| H    | -2.576465 | 0.175104  | -2.876867 |
| H    | -3.521473 | -1.176576 | -2.193612 |
| H    | -4.341860 | 0.345201  | -2.634539 |
| C    | -3.191290 | 2.004240  | -0.837236 |
| H    | -2.267703 | 2.376428  | -1.300152 |
| H    | -4.057371 | 2.366323  | -1.403232 |
| H    | -3.255191 | 2.395217  | 0.187279  |
| O    | -0.834065 | 0.404633  | -1.182950 |
| C    | 2.668585  | 0.983837  | -2.597635 |
| C    | 3.278202  | 2.163324  | -2.773594 |
| H    | 4.366837  | 2.253119  | -2.759390 |
| H    | 2.698754  | 3.071687  | -2.964961 |
| H    | 3.287684  | 0.096740  | -2.406638 |
| C    | 2.056370  | 2.219012  | 0.041102  |
| O    | 0.920148  | 1.870400  | -0.284434 |
| H    | 2.869825  | 1.474991  | 0.070336  |
| C    | 2.981936  | 6.181366  | 1.206267  |
| C    | 1.683456  | 5.874548  | 0.785928  |
| C    | 1.369105  | 4.578504  | 0.399721  |
| C    | 2.362977  | 3.588475  | 0.436829  |
| C    | 3.663566  | 3.897779  | 0.855814  |
| C    | 3.971867  | 5.198031  | 1.242229  |
| H    | 3.223891  | 7.201522  | 1.508568  |

|   |           |           |           |
|---|-----------|-----------|-----------|
| H | 0.920239  | 6.652842  | 0.761012  |
| H | 0.366060  | 4.309675  | 0.064759  |
| H | 4.426413  | 3.116169  | 0.874644  |
| H | 4.980979  | 5.447735  | 1.570565  |
| C | 1.199304  | 0.779010  | -2.559129 |
| C | 0.329841  | 1.551698  | -3.510744 |
| C | 0.537763  | 0.081858  | -3.726233 |
| H | 0.815127  | 2.230427  | -4.215096 |
| H | -0.647283 | 1.872764  | -3.145694 |
| H | -0.295087 | -0.588893 | -3.501463 |
| H | 1.169323  | -0.218582 | -4.565539 |
| O | -4.135324 | -0.037686 | 0.102935  |
| C | -5.417187 | 0.226637  | -0.012574 |
| C | -6.155707 | -0.457913 | 1.156156  |
| O | -5.979393 | 0.876391  | -0.841301 |
| F | -5.710741 | 0.016557  | 2.317572  |
| F | -5.939929 | -1.769842 | 1.135439  |
| F | -7.454292 | -0.239100 | 1.078483  |
| C | 1.342398  | -0.740919 | -0.303054 |
| C | 1.688435  | -0.724673 | 1.052257  |
| C | 1.651850  | -1.908494 | -1.017527 |
| C | 2.289333  | -1.822303 | 1.671749  |
| H | 1.475659  | 0.154702  | 1.667699  |
| C | 2.252405  | -3.005077 | -0.402552 |
| H | 1.406353  | -1.965239 | -2.082010 |
| C | 2.574558  | -2.977599 | 0.953037  |
| H | 3.039163  | -3.836756 | 1.435753  |
| C | 2.607699  | -1.721307 | 3.138388  |
| C | 2.574251  | -4.213442 | -1.241457 |
| F | 3.420924  | -0.686935 | 3.384805  |
| F | 3.200364  | -2.818311 | 3.604549  |
| F | 1.503398  | -1.518164 | 3.862003  |
| F | 2.979292  | -5.244677 | -0.499902 |
| F | 1.514514  | -4.612610 | -1.947069 |
| F | 3.545448  | -3.947050 | -2.119429 |

TS3

M06-2X-D3 SCF energy: -2305.64885659 a.u.  
M06-2X-D3 enthalpy: -2305.077570 a.u.  
M06-2X-D3 free energy: -2305.195614 a.u.  
M06-2X-D3 SCF energy in solution: -2308.32468391 a.u.  
M06-2X-D3 enthalpy in solution: -2307.753397 a.u.  
M06-2X-D3 free energy in solution: -2307.871441 a.u.  
Three lowest frequencies (cm-1): -345.2893 13.0751 14.7029  
Imaginary frequency: -345.2893 cm-1

Cartesian coordinates

| ATOM | X         | Y         | Z         |
|------|-----------|-----------|-----------|
| B    | 0.578063  | 0.505768  | -1.036363 |
| C    | -3.134933 | 0.407303  | -0.805594 |
| C    | -1.762095 | -0.077822 | -0.225104 |
| C    | -1.736786 | -1.606439 | -0.111094 |
| H    | -0.854860 | -1.931706 | 0.456387  |
| H    | -2.633836 | -1.969746 | 0.408179  |

|   |           |           |           |
|---|-----------|-----------|-----------|
| H | -1.685065 | -2.066834 | -1.107458 |
| C | -1.522880 | 0.553674  | 1.149535  |
| H | -1.324097 | 1.629262  | 1.058745  |
| H | -2.396679 | 0.397422  | 1.796505  |
| H | -0.657594 | 0.084095  | 1.634743  |
| C | -3.415803 | -0.205142 | -2.172674 |
| H | -2.580216 | 0.036267  | -2.842232 |
| H | -3.507519 | -1.296995 | -2.102962 |
| H | -4.344723 | 0.200941  | -2.590597 |
| C | -3.211976 | 1.930507  | -0.852124 |
| H | -2.302390 | 2.308978  | -1.337040 |
| H | -4.093702 | 2.258288  | -1.414922 |
| H | -3.268235 | 2.349374  | 0.161655  |
| O | -0.822609 | 0.372427  | -1.178844 |
| C | 2.529552  | 1.142058  | -2.516035 |
| C | 2.896564  | 2.423522  | -2.168038 |
| H | 3.943206  | 2.673923  | -1.982983 |
| H | 2.229151  | 3.251046  | -2.419048 |
| H | 3.268231  | 0.336152  | -2.411314 |
| C | 2.126453  | 2.232701  | -0.232365 |
| O | 0.917286  | 1.828660  | -0.392248 |
| H | 2.883419  | 1.503859  | 0.089560  |
| C | 2.714391  | 6.222220  | 1.162691  |
| C | 1.483693  | 5.850872  | 0.616607  |
| C | 1.286984  | 4.553390  | 0.154626  |
| C | 2.327651  | 3.621323  | 0.240658  |
| C | 3.558434  | 3.992936  | 0.791394  |
| C | 3.751033  | 5.292820  | 1.251641  |
| H | 2.864314  | 7.240373  | 1.524531  |
| H | 0.673025  | 6.577919  | 0.554563  |
| H | 0.330458  | 4.241780  | -0.268090 |
| H | 4.363901  | 3.257899  | 0.864818  |
| H | 4.709296  | 5.580478  | 1.685546  |
| C | 1.157188  | 0.783124  | -2.658968 |
| C | 0.188218  | 1.410714  | -3.601281 |
| C | 0.524411  | -0.060152 | -3.717775 |
| H | 0.583165  | 2.078778  | -4.370472 |
| H | -0.801733 | 1.660334  | -3.216278 |
| H | -0.248659 | -0.763851 | -3.400188 |
| H | 1.133836  | -0.381140 | -4.565471 |
| O | -4.102154 | -0.100679 | 0.159521  |
| C | -5.390711 | 0.131884  | 0.049235  |
| C | -6.103325 | -0.533868 | 1.244590  |
| O | -5.974704 | 0.742524  | -0.794093 |
| F | -5.651191 | -0.025297 | 2.388171  |
| F | -5.867563 | -1.842684 | 1.251850  |
| F | -7.406020 | -0.336842 | 1.178299  |
| C | 1.385265  | -0.714599 | -0.328358 |
| C | 1.775723  | -0.674047 | 1.015304  |
| C | 1.668315  | -1.892836 | -1.032972 |
| C | 2.395841  | -1.761174 | 1.633305  |
| H | 1.582580  | 0.222038  | 1.613650  |
| C | 2.292317  | -2.977946 | -0.419794 |
| H | 1.382786  | -1.974658 | -2.085059 |
| C | 2.658662  | -2.927954 | 0.923612  |
| H | 3.138960  | -3.779248 | 1.404941  |

|   |          |           |           |
|---|----------|-----------|-----------|
| C | 2.760189 | -1.639245 | 3.088027  |
| C | 2.588435 | -4.199361 | -1.248574 |
| F | 3.568833 | -0.593997 | 3.296226  |
| F | 3.380548 | -2.725062 | 3.545905  |
| F | 1.677473 | -1.441979 | 3.844288  |
| F | 2.993126 | -5.226590 | -0.502147 |
| F | 1.514432 | -4.594384 | -1.935401 |
| F | 3.549834 | -3.954065 | -2.144462 |

IM3a

M06-2X-D3 SCF energy: -2305.69859892 a.u.  
M06-2X-D3 enthalpy: -2305.124550 a.u.  
M06-2X-D3 free energy: -2305.246118 a.u.  
M06-2X-D3 SCF energy in solution: -2308.37601436 a.u.  
M06-2X-D3 enthalpy in solution: -2307.801965 a.u.  
M06-2X-D3 free energy in solution: -2307.923533 a.u.  
Three lowest frequencies (cm-1): 12.6399 14.5825 18.4260

Cartesian coordinates

| ATOM | X         | Y         | Z         |
|------|-----------|-----------|-----------|
| B    | 0.479623  | 0.757215  | -0.269711 |
| C    | -3.205941 | 1.077921  | -0.241061 |
| C    | -1.946575 | 0.226738  | 0.137401  |
| C    | -2.073781 | -1.188115 | -0.431179 |
| H    | -1.325668 | -1.857275 | 0.011019  |
| H    | -3.069331 | -1.589655 | -0.198840 |
| H    | -1.938461 | -1.190638 | -1.521297 |
| C    | -1.761665 | 0.169065  | 1.654265  |
| H    | -1.534672 | 1.164076  | 2.059301  |
| H    | -2.668399 | -0.216166 | 2.137716  |
| H    | -0.928657 | -0.504282 | 1.900359  |
| C    | -3.466147 | 1.053616  | -1.743625 |
| H    | -2.545919 | 1.337788  | -2.269834 |
| H    | -3.765135 | 0.050104  | -2.074714 |
| H    | -4.262279 | 1.759294  | -2.007498 |
| C    | -3.108908 | 2.505923  | 0.283472  |
| H    | -2.181155 | 2.958172  | -0.089212 |
| H    | -3.965728 | 3.095104  | -0.063627 |
| H    | -3.094178 | 2.522876  | 1.381133  |
| O    | -0.860674 | 0.945409  | -0.445642 |
| C    | 2.191584  | 0.897930  | -2.826671 |
| C    | 2.881317  | 2.002986  | -2.079089 |
| H    | 3.967658  | 1.997687  | -2.250808 |
| H    | 2.488665  | 2.978804  | -2.402135 |
| H    | 2.678970  | -0.081196 | -2.892288 |
| C    | 2.633313  | 1.885604  | -0.558872 |
| O    | 1.240475  | 1.882282  | -0.327742 |
| H    | 3.078697  | 0.939919  | -0.206035 |
| C    | 4.526095  | 5.172407  | 1.489078  |
| C    | 3.166758  | 5.232060  | 1.185068  |
| C    | 2.542816  | 4.166034  | 0.537907  |
| C    | 3.276511  | 3.028816  | 0.191988  |
| C    | 4.638059  | 2.971280  | 0.503292  |
| C    | 5.261868  | 4.037911  | 1.146903  |

|   |           |           |           |
|---|-----------|-----------|-----------|
| H | 5.011492  | 6.006918  | 1.997130  |
| H | 2.585808  | 6.115234  | 1.455649  |
| H | 1.478271  | 4.201383  | 0.304041  |
| H | 5.214314  | 2.078391  | 0.246230  |
| H | 6.324048  | 3.979965  | 1.389180  |
| C | 0.967284  | 1.059686  | -3.311906 |
| C | -0.144964 | 1.993299  | -3.488447 |
| C | -0.249940 | 0.531132  | -3.927713 |
| H | -0.069344 | 2.747567  | -4.276491 |
| H | -0.690299 | 2.304674  | -2.592272 |
| H | -0.886993 | -0.128423 | -3.327920 |
| H | -0.258670 | 0.318494  | -4.999831 |
| O | -4.277647 | 0.375292  | 0.449728  |
| C | -5.534839 | 0.757681  | 0.366010  |
| C | -6.390599 | -0.225558 | 1.190832  |
| O | -5.997292 | 1.682981  | -0.227833 |
| F | -5.976117 | -0.249361 | 2.454308  |
| F | -6.276016 | -1.454457 | 0.693828  |
| F | -7.659980 | 0.128300  | 1.164756  |
| C | 1.140113  | -0.660090 | 0.021169  |
| C | 1.780020  | -0.928891 | 1.236700  |
| C | 1.133305  | -1.667178 | -0.950417 |
| C | 2.372913  | -2.169277 | 1.477269  |
| H | 1.822062  | -0.162178 | 2.016514  |
| C | 1.740468  | -2.898248 | -0.713347 |
| H | 0.653009  | -1.487540 | -1.916330 |
| C | 2.360476  | -3.164917 | 0.504791  |
| H | 2.828251  | -4.131169 | 0.691650  |
| C | 3.046384  | -2.397678 | 2.805426  |
| C | 1.715268  | -3.924500 | -1.814543 |
| F | 4.085775  | -1.575866 | 2.965888  |
| F | 3.495560  | -3.645274 | 2.929256  |
| F | 2.207888  | -2.164503 | 3.817058  |
| F | 2.281796  | -5.071260 | -1.445520 |
| F | 0.464112  | -4.191883 | -2.195427 |
| F | 2.362478  | -3.481865 | -2.896205 |

TS4

|                                    |                     |         |         |
|------------------------------------|---------------------|---------|---------|
| M06-2X-D3 SCF energy:              | -1249.09151959 a.u. |         |         |
| M06-2X-D3 enthalpy:                | -1248.665499 a.u.   |         |         |
| M06-2X-D3 free energy:             | -1248.741115 a.u.   |         |         |
| M06-2X-D3 SCF energy in solution:  | -3424.28010821 a.u. |         |         |
| M06-2X-D3 enthalpy in solution:    | -3423.854088 a.u.   |         |         |
| M06-2X-D3 free energy in solution: | -3423.929704 a.u.   |         |         |
| Three lowest frequencies (cm-1):   | -346.7103           | 39.7655 | 47.4999 |
| Imaginary frequency:               | -346.7103 cm-1      |         |         |

Cartesian coordinates

| ATOM | X         | Y         | Z         |
|------|-----------|-----------|-----------|
| B    | -0.636526 | -0.126004 | 0.209677  |
| C    | -2.008708 | -1.669424 | -0.826753 |
| C    | -1.895694 | -1.942692 | 0.720561  |
| C    | -0.856163 | -3.017117 | 1.049698  |
| H    | -0.686622 | -3.013064 | 2.135335  |

|   |           |           |           |
|---|-----------|-----------|-----------|
| H | -1.194524 | -4.018581 | 0.748292  |
| H | 0.103170  | -2.805491 | 0.556997  |
| C | -3.215975 | -2.274413 | 1.398587  |
| H | -3.918828 | -1.437116 | 1.313788  |
| H | -3.670266 | -3.174018 | 0.956796  |
| H | -3.038532 | -2.464338 | 2.466400  |
| C | -3.364923 | -1.087579 | -1.220057 |
| H | -4.152524 | -1.853690 | -1.179555 |
| H | -3.646163 | -0.255581 | -0.563883 |
| H | -3.297094 | -0.703235 | -2.247259 |
| C | -1.703078 | -2.879991 | -1.698948 |
| H | -2.399678 | -3.703961 | -1.482828 |
| H | -1.815839 | -2.603570 | -2.756905 |
| H | -0.676324 | -3.234522 | -1.545000 |
| O | -1.420920 | -0.696519 | 1.226529  |
| O | -1.002552 | -0.675764 | -1.048443 |
| C | 0.180131  | 2.000155  | -0.812718 |
| C | 1.546198  | 2.055039  | -0.713871 |
| H | 2.150881  | 2.247201  | -1.601828 |
| H | 2.028936  | 2.223442  | 0.249653  |
| H | -0.267109 | 1.997864  | -1.812396 |
| C | 1.660878  | -0.092480 | -0.490132 |
| O | 0.850200  | -0.318672 | 0.468966  |
| H | 1.314162  | -0.308319 | -1.510425 |
| C | 5.848010  | -0.398839 | 0.257008  |
| C | 4.951877  | -0.367494 | 1.327699  |
| C | 3.584617  | -0.262382 | 1.091896  |
| C | 3.111375  | -0.186288 | -0.223338 |
| C | 4.009594  | -0.225155 | -1.295171 |
| C | 5.376541  | -0.330241 | -1.054634 |
| H | 6.919210  | -0.481914 | 0.446160  |
| H | 5.322977  | -0.430236 | 2.351435  |
| H | 2.867275  | -0.249971 | 1.914159  |
| H | 3.631558  | -0.174144 | -2.319172 |
| H | 6.076271  | -0.362186 | -1.890558 |
| C | -0.702427 | 1.662911  | 0.275412  |
| C | -0.309638 | 2.070251  | 1.692985  |
| C | -2.119873 | 2.107068  | -0.025458 |
| H | 0.693825  | 1.704767  | 1.939918  |
| H | -0.333994 | 3.163708  | 1.811336  |
| H | -1.007515 | 1.613988  | 2.406924  |
| F | -2.232134 | 3.443210  | 0.091264  |
| F | -3.017952 | 1.584234  | 0.808987  |
| F | -2.504458 | 1.807294  | -1.270116 |

IM5

|                                    |                     |         |         |
|------------------------------------|---------------------|---------|---------|
| M06-2X-D3 SCF energy:              | -2344.92973309 a.u. |         |         |
| M06-2X-D3 enthalpy:                | -2344.328218 a.u.   |         |         |
| M06-2X-D3 free energy:             | -2344.453606 a.u.   |         |         |
| M06-2X-D3 SCF energy in solution:  | -2347.65100472 a.u. |         |         |
| M06-2X-D3 enthalpy in solution:    | -2347.049490 a.u.   |         |         |
| M06-2X-D3 free energy in solution: | -2347.174878 a.u.   |         |         |
| Three lowest frequencies (cm-1):   | 9.4567              | 14.7617 | 16.5972 |

Cartesian coordinates

| ATOM | X         | Y         | Z         |
|------|-----------|-----------|-----------|
| B    | 0.596529  | 0.384991  | -1.181826 |
| C    | -3.034353 | -0.409983 | -0.916731 |
| C    | -1.604890 | -0.588319 | -0.295771 |
| C    | -1.267404 | -2.075407 | -0.144906 |
| H    | -0.341932 | -2.198481 | 0.432900  |
| H    | -2.075378 | -2.602533 | 0.380349  |
| H    | -1.114672 | -2.538036 | -1.129578 |
| C    | -1.544387 | 0.102673  | 1.071557  |
| H    | -1.536273 | 1.195167  | 0.960190  |
| H    | -2.408395 | -0.190962 | 1.682856  |
| H    | -0.638250 | -0.199565 | 1.610747  |
| C    | -3.153027 | -1.101129 | -2.269626 |
| H    | -2.362395 | -0.717561 | -2.927507 |
| H    | -3.032570 | -2.187627 | -2.167909 |
| H    | -4.131708 | -0.895951 | -2.719686 |
| C    | -3.414672 | 1.064370  | -1.016256 |
| H    | -2.604014 | 1.590899  | -1.537524 |
| H    | -4.349159 | 1.187214  | -1.575940 |
| H    | -3.542578 | 1.505572  | -0.018241 |
| O    | -0.762238 | 0.026780  | -1.243536 |
| C    | 2.501610  | 1.320587  | -2.783232 |
| C    | 2.828404  | 2.534334  | -3.236794 |
| H    | 3.869830  | 2.858070  | -3.296114 |
| H    | 2.062237  | 3.237122  | -3.575899 |
| H    | 3.308470  | 0.651344  | -2.452718 |
| C    | 1.310455  | 2.791569  | 0.018627  |
| O    | 0.543844  | 1.923628  | -0.402652 |
| C    | -0.486561 | 6.527181  | 1.052655  |
| C    | -1.238110 | 5.532479  | 0.422902  |
| C    | -0.643854 | 4.321895  | 0.088300  |
| C    | 0.711457  | 4.101114  | 0.377688  |
| C    | 1.461511  | 5.104327  | 1.006575  |
| C    | 0.860327  | 6.312914  | 1.345802  |
| H    | -0.954561 | 7.476764  | 1.316630  |
| H    | -2.290177 | 5.704134  | 0.193403  |
| H    | -1.211810 | 3.531431  | -0.404055 |
| H    | 2.514101  | 4.945104  | 1.242043  |
| H    | 1.444013  | 7.090078  | 1.839864  |
| C    | 1.122088  | 0.779057  | -2.657581 |
| C    | 0.083403  | 1.234382  | -3.644815 |
| C    | 0.646670  | -0.149503 | -3.758347 |
| H    | 0.379251  | 1.953361  | -4.410772 |
| H    | -0.940849 | 1.333069  | -3.281781 |
| H    | 0.008639  | -0.988062 | -3.468780 |
| H    | 1.333107  | -0.344602 | -4.585551 |
| O    | -3.902313 | -1.074730 | 0.047279  |
| C    | -5.208209 | -1.113889 | -0.093411 |
| C    | -5.799892 | -1.867886 | 1.115404  |
| O    | -5.883963 | -0.663326 | -0.968275 |
| F    | -5.488054 | -1.236020 | 2.244807  |
| F    | -5.304675 | -3.100021 | 1.180605  |
| F    | -7.113511 | -1.941652 | 1.019928  |
| C    | 1.600186  | -0.527992 | -0.300795 |
| C    | 1.866351  | -0.332124 | 1.058034  |

|   |          |           |           |
|---|----------|-----------|-----------|
| C | 2.241235 | -1.610850 | -0.918666 |
| C | 2.722061 | -1.170566 | 1.770084  |
| H | 1.400796 | 0.500887  | 1.591677  |
| C | 3.093450 | -2.456558 | -0.207748 |
| H | 2.068720 | -1.800656 | -1.982193 |
| C | 3.343973 | -2.247887 | 1.146467  |
| H | 4.012554 | -2.906179 | 1.700332  |
| C | 2.948987 | -0.870180 | 3.225377  |
| C | 3.764950 | -3.584924 | -0.944818 |
| F | 3.381957 | 0.388639  | 3.392816  |
| F | 3.848721 | -1.679795 | 3.777932  |
| F | 1.819101 | -0.977637 | 3.928850  |
| F | 4.435734 | -4.391301 | -0.121750 |
| F | 2.877943 | -4.329375 | -1.607675 |
| F | 4.633974 | -3.123124 | -1.848362 |
| C | 2.777991 | 2.568827  | 0.229193  |
| H | 2.975167 | 2.529276  | 1.313410  |
| H | 3.105253 | 1.633349  | -0.227889 |
| H | 3.348074 | 3.405127  | -0.195028 |

TS5

M06-2X-D3 SCF energy: -2344.91209215 a.u.  
M06-2X-D3 enthalpy: -2344.311686 a.u.  
M06-2X-D3 free energy: -2344.431983 a.u.  
M06-2X-D3 SCF energy in solution: -3424.32899098 a.u.  
M06-2X-D3 enthalpy in solution: -3423.728585 a.u.  
M06-2X-D3 free energy in solution: -3423.848882 a.u.  
Three lowest frequencies (cm-1): -408.0889 13.0195 14.9393  
Imaginary frequency: -408.0889 cm-1

Cartesian coordinates

| ATOM | X         | Y         | Z         |
|------|-----------|-----------|-----------|
| B    | 0.636955  | 0.579159  | -0.880593 |
| C    | -3.056547 | 0.036496  | -0.833529 |
| C    | -1.662115 | -0.330739 | -0.216812 |
| C    | -1.458746 | -1.850358 | -0.236564 |
| H    | -0.577581 | -2.129073 | 0.355531  |
| H    | -2.334176 | -2.358994 | 0.189762  |
| H    | -1.300488 | -2.205634 | -1.264312 |
| C    | -1.570944 | 0.196992  | 1.218806  |
| H    | -1.458064 | 1.289223  | 1.226365  |
| H    | -2.468409 | -0.081785 | 1.787141  |
| H    | -0.704609 | -0.241859 | 1.729121  |
| C    | -3.204772 | -0.504866 | -2.251203 |
| H    | -2.351201 | -0.161172 | -2.849649 |
| H    | -3.214110 | -1.602841 | -2.251674 |
| H    | -4.135828 | -0.145689 | -2.705387 |
| C    | -3.310880 | 1.539552  | -0.781595 |
| H    | -2.454149 | 2.051068  | -1.239456 |
| H    | -4.226452 | 1.796374  | -1.327201 |
| H    | -3.411493 | 1.883897  | 0.256538  |
| O    | -0.744669 | 0.322252  | -1.068697 |
| C    | 2.432760  | 1.688370  | -2.312696 |
| C    | 2.501424  | 3.004009  | -1.892909 |

|   |           |           |           |
|---|-----------|-----------|-----------|
| H | 3.466187  | 3.483530  | -1.716731 |
| H | 1.669070  | 3.663412  | -2.145909 |
| H | 3.326119  | 1.053422  | -2.243223 |
| C | 1.861497  | 2.619676  | 0.028969  |
| O | 0.819744  | 1.857524  | -0.119233 |
| C | 0.721587  | 6.627412  | 1.117280  |
| C | -0.214188 | 5.737897  | 0.586339  |
| C | 0.167197  | 4.446787  | 0.237789  |
| C | 1.492769  | 4.026098  | 0.415801  |
| C | 2.425992  | 4.922425  | 0.949212  |
| C | 2.040122  | 6.215795  | 1.298511  |
| H | 0.421723  | 7.639752  | 1.391491  |
| H | -1.249263 | 6.052238  | 0.446143  |
| H | -0.556538 | 3.741680  | -0.172594 |
| H | 3.462376  | 4.622546  | 1.103700  |
| H | 2.776156  | 6.903144  | 1.717357  |
| C | 1.169445  | 1.069989  | -2.496623 |
| C | 0.100755  | 1.567091  | -3.407957 |
| C | 0.692692  | 0.186723  | -3.601666 |
| H | 0.375629  | 2.336014  | -4.134095 |
| H | -0.918082 | 1.617941  | -3.022842 |
| H | 0.054776  | -0.656911 | -3.326926 |
| H | 1.345230  | 0.020911  | -4.461789 |
| O | -3.999900 | -0.644568 | 0.044672  |
| C | -5.300056 | -0.571752 | -0.131397 |
| C | -5.983427 | -1.389010 | 0.984391  |
| O | -5.912676 | 0.008124  | -0.976159 |
| F | -5.672512 | -0.884272 | 2.175725  |
| F | -5.572370 | -2.653226 | 0.950349  |
| F | -7.294651 | -1.364171 | 0.842321  |
| C | 1.524534  | -0.641041 | -0.287248 |
| C | 1.769005  | -0.738605 | 1.088617  |
| C | 2.028331  | -1.670748 | -1.090020 |
| C | 2.463203  | -1.812574 | 1.639723  |
| H | 1.413394  | 0.052412  | 1.754103  |
| C | 2.725025  | -2.749412 | -0.541040 |
| H | 1.876312  | -1.640357 | -2.171838 |
| C | 2.947070  | -2.837198 | 0.830158  |
| H | 3.491361  | -3.678945 | 1.257055  |
| C | 2.679706  | -1.822321 | 3.127805  |
| C | 3.228299  | -3.820566 | -1.471091 |
| F | 3.351077  | -0.732969 | 3.522670  |
| F | 3.368749  | -2.887181 | 3.533047  |
| F | 1.518869  | -1.814434 | 3.787689  |
| F | 3.933315  | -4.752975 | -0.830849 |
| F | 2.221718  | -4.435467 | -2.096516 |
| F | 4.013295  | -3.304282 | -2.422005 |
| C | 3.131777  | 2.051997  | 0.631672  |
| H | 2.975399  | 1.907379  | 1.712844  |
| H | 3.387252  | 1.084683  | 0.190808  |
| H | 3.978201  | 2.733256  | 0.495773  |

## References

---

- 1 (a) S. Grimme, J. Antony, S. Ehrlich and H. Krieg, *J. Chem. Phys.*, 2010, **132**, 154104. (b) S. Grimme, S. Ehrlich and L. Goerigk, *J. Comput. Chem.*, 2011, **32**, 1456-1465.
- 2 A. V. Marenich, C. J. Cramer and D. G. Truhlar, *J. Phys. Chem. B*, 2009, **113**, 6378-6396.
- 3 M. J. Frisch, G. W. Trucks, H. B. Schlegel, G. E. Scuseria, M. A. Robb, J. R. Cheeseman, G. Scalmani, V. Barone, B. Mennucci, G. A. Petersson, H. Nakatsuji, M. Caricato, X. Li, H. P. Hratchian, A. F. Izmaylov, J. Bloino, G. Zheng, J. L. Sonnenberg, M. Hada, M. Ehara, K. Toyota, R. Fukuda, J. Hasegawa, M. Ishida, T. Nakajima, Y. Honda, O. Kitao, H. Nakai, T. Vreven, J. A. Montgomery, Jr., J. E. Peralta, F. Ogliaro, M. Bearpark, J. J. Heyd, E. Brothers, K. N. Kudin, V. N. Staroverov, R. Kobayashi, J. Normand, K. Raghavachari, A. Rendell, J. C. Burant, S. S. Iyengar, J. Tomasi, M. Cossi, N. Rega, J. M. Millam, M. Klene, J. E. Knox, J. B. Cross, V. Bakken, C. Adamo, J. Jaramillo, R. Gomperts, R. E. Stratmann, O. Yazyev, A. J. Austin, R. Cammi, C. Pomelli, J. W. Ochterski, R. L. Martin, K. Morokuma, V. G. Zakrzewski, G. A. Voth, P. Salvador, J. J. Dannenberg, S. Dapprich, A. D. Daniels, Ö. Farkas, J. B. Foresman, J. V. Ortiz, J. Cioslowski and D. J. Fox, *Gaussian 09, Revision D.01*, Gaussian, Inc., Wallingford, CT, 2009.
- 4 Y. Shao, Z. Gan, E. Epifanovsky, A. T. B. Gilbert, J. Kussmann, A. W. Lange, D. Ghosh, M. Goldey, P. R. Horn, I. Kaliman, R. Z. Khaliullin, T. Kuś, E. I. Proynov, M. A. Rohrdanz, R. P. Steele, E. J. Sundstrom, P. M. Zimmerman, D. Zuev, B. Albrecht, E. Alguire, E. Berquist, K. Brandhorst, D. Casanova, Y. Chen, S. H. Chien, D. L. Crittenden, M. Diedenhofen, R. A. Distasio, A. D. Dutoi, R. G. Edgar, S. Fatehi, L. FustiMolnar, A. Ghysels, A. Golubeva-Zadorozhnaya, J. Gomes, M. W. D. Hanson-Heine, P. H. P. Harbach, E. G. Hohenstein, Z. C. Holden, T. Jagau, H. Ji, B. Kaduk, K. Khistyayev, P. Klunzinger, T. Kowalczyk, C. M. Krauter, K. V. Lawler, S. V. Levchenko, F. Liu, R. C. Lochan, S. Mao, A. V. Marenich, S. A. Maurer, C. M. Oana, R. OlivaresAmaya, D. P. O'Neill, T. M. Perrine, R. Peverati, A. Prociuk, D. R. Rehn, N. J. Russ, S. M. Sharada, S. Sharma, A. Sodt, T. Stein, D. Stück, Y. Su, T. Tsuchimochi, L. Vogt, O. Vydrov, M. A. Watson, J. Wenzel, J. Yang, S. Yeganeh, S. R. Yost, I. Y. Zhang, B. R. Brooks, G. K. L. Chan, D. M. Chipman, C. J. Cramer, M. S. Gordon, W. J. Hehre, A. Klamt, H. F. Schaefer, M. W. Schmidt, D. G. Truhlar, X. Xu, A. T. Bell, N. A. Besley, B. D. Dunietz, J. Kong, D. S. Lambrecht, W. Liang, C. Ochsenfeld, L. V. Slipchenko, J. E. Subotnik, T. Van Voorhis, J. M. Herbert, A. I. Krylov and P. M. W. Gill, *Advances in molecular quantum chemistry contained in the Q-Chem 4 program package*, *Mol. Phys.*, 2015, **113**, 184–215.
- 5 C. Y. Legault, CYLview, 1.0b, Université de Sherbrooke, 2009, <http://www.cylview.org>.
- 6 E. D. Glendening, C. R. Landis and F. Weinhold, *J. Comput. Chem.*, 2019, **40**, 2234-2241.
